# Supplementary material for: Across-cities transportable 13C hyperpolarization using UV-induced labile radicals
Source: Research Square preprint supplement (doi:10.21203/rs.3.rs-6490603/v1), 2025-05-23
Supplement: Supplementary file 1 [file 7ddfd3c4486b1050119d35f8.pdf]

## SUPPORTING INFORMATION

### Across-cities transportable <sup>13</sup>C hyperpolarization using UV-induced labile radicals

Andrea Capozzi <sup>1,2,\*</sup>, Magnus Karlsson <sup>2</sup>, Yupeng Zhao <sup>2</sup>, Jan Kilund <sup>2</sup>, Esben Søvsø Szocska Hansen <sup>3</sup>, Lotte Bonde Bertelsen <sup>3</sup>, Christoffer Laustsen <sup>3</sup>, Jan Henrik Ardenkjær-Larsen <sup>2</sup>, and Mathilde H. Lerche <sup>2</sup>.

<sup>1</sup> LIFMET, Department of Physics, EPFL, Station 6 (Batiment CH), 1015 Lausanne (Switzerland).

<sup>2</sup> HYPERMAG, Department of Health Technology, Technical University of Denmark, Building 349, 2800 Kgs Lyngby (Denmark).

<sup>3</sup>The MR Center, Department of Clinical Medicine, Aarhus University, Palle Juul-Jensens Boulevard 99, 8200 Aarhus N (Denmark)

#### Corresponding author

\*Dr. Andrea Capozzi

EPFL SB IPHYS LIFMET

CH F0 632 (Bâtiment CH), Station 6, CH-1015 Lausanne

Email: [andrea.capozzi@epfl.ch](mailto:andrea.capozzi@epfl.ch); ORCID: 0000-0002-2306-9049

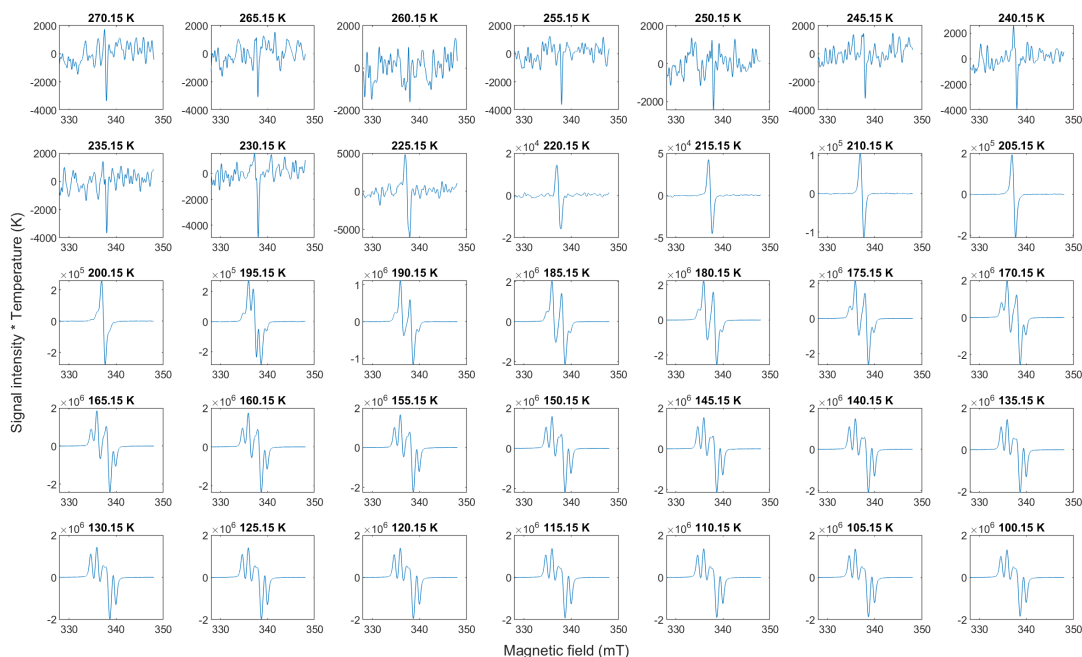

**Figure S1. Radical quench dynamics for AKG:** one 10  $\mu$ L bead of 2M glucose and 0.7 M AKG dissolved in  $d_8$ -glycerol: $D_2O$  1:1 (v/v) was irradiated for 300 s vial UV-light at 35 W/cm<sup>2</sup> and transferred in the VTI of an X-band ESR spectrometer. The temperature was increased in steps of 5 K from 100.15 K to 275.15 K. At each temperature step the ESR signal was acquired. No signal could be detected above 230.15 K, thus, 225.15 K was set as heating threshold for the thermalization experiment.

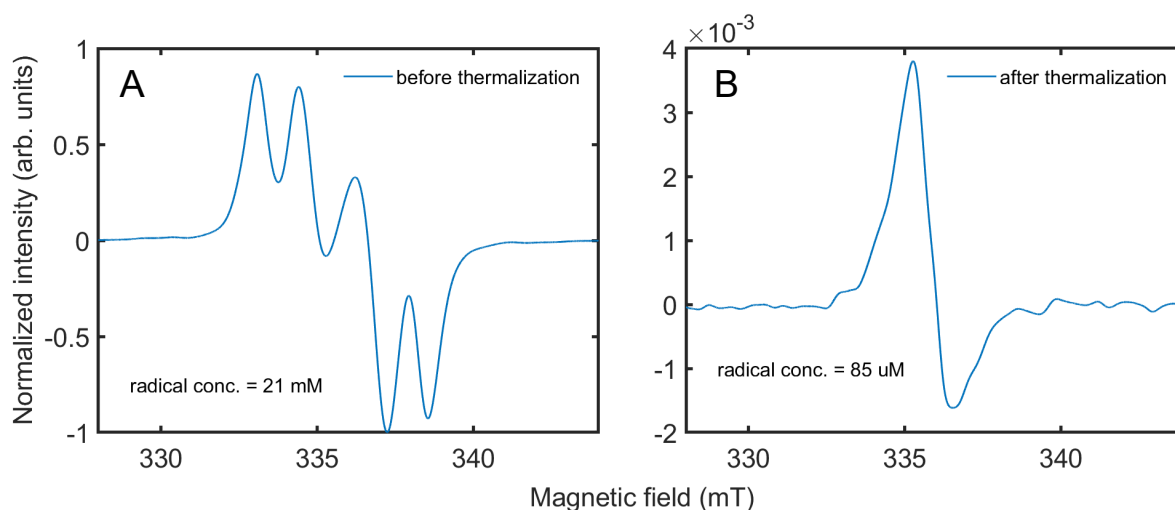

**Figure S2. Radical left-over after thermalization:** ESR signal of the glucose sample before the DNP experiment (A). ESR signal of the glucose sample after thermalization (B); the heating process by means of He gas quenched more than 99.5% of the initial radical concentration.

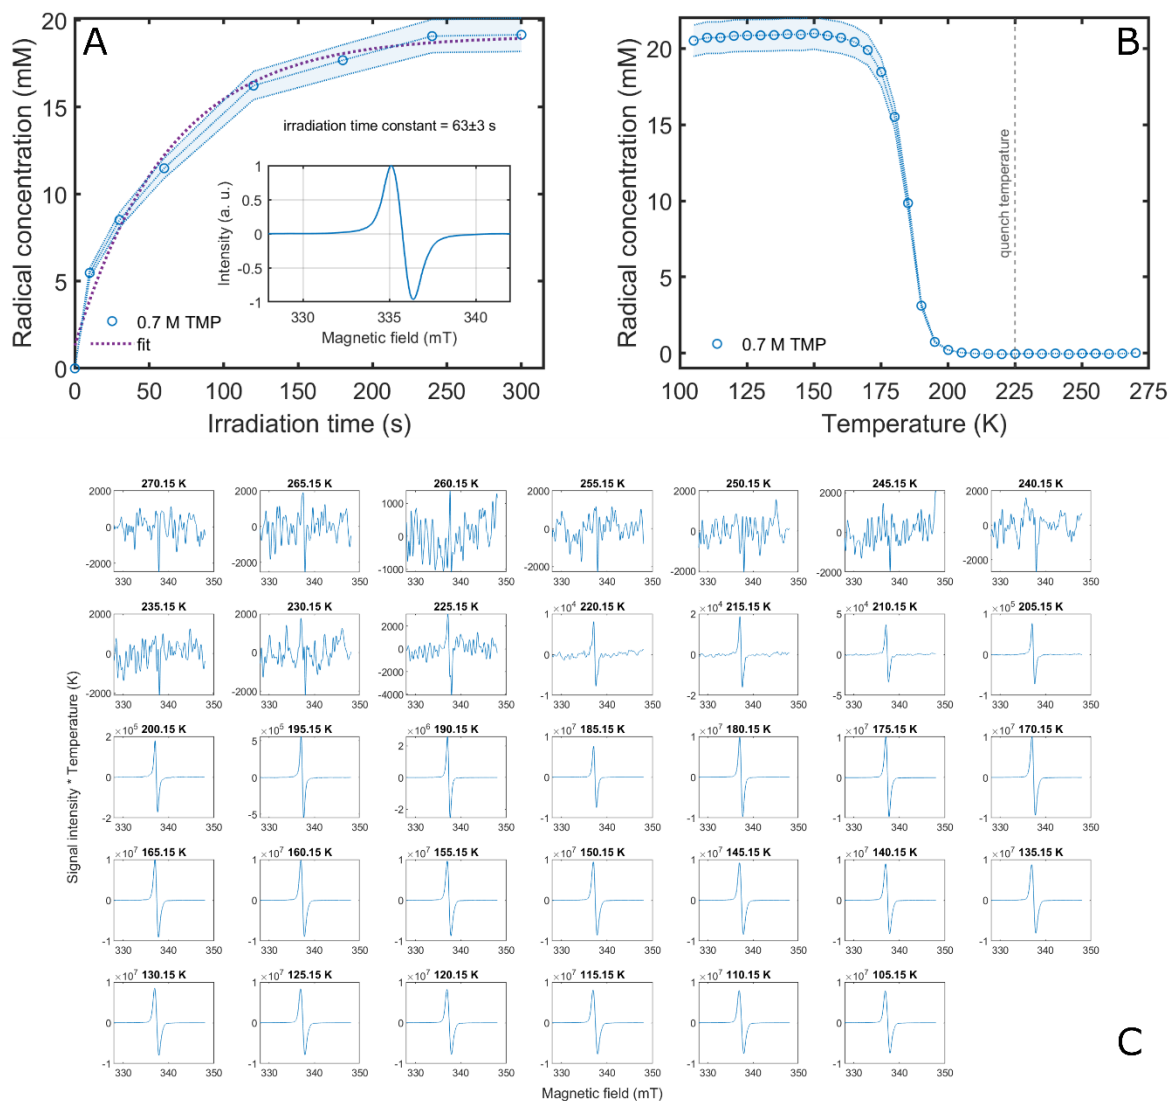

**Figure S3. Radical properties of the glucose sample with TMP as precursor:** radical generation by means of UV-light irradiation in liquid nitrogen (**A**), quench temperature measurement (**B**), and quench temperature dynamic (**C**) for a sample containing 2M glucose and 0.7 M TMP dissolved in glycerol:water 1:1 (v/v).

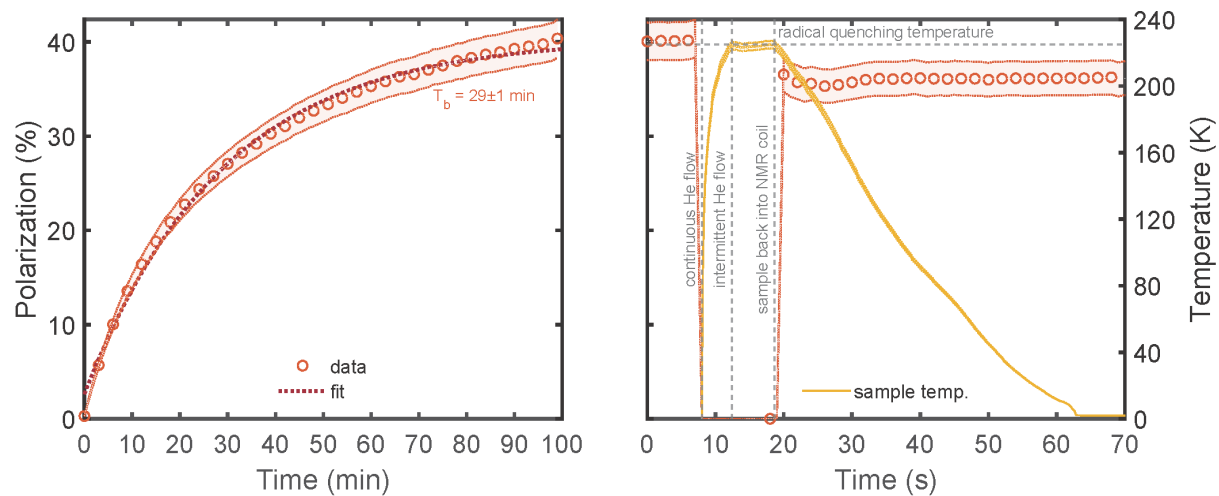

**Figure S4. Effect of a protonated matrix on DNP performance:** polarization (A) and thermalization (B) for a glucose sample prepared with a protonated solvent and AKG as radical precursor. Deuterating the solvent, increased the maximum achievable polarization by 10%; deuteration had no effect on the behavior of the sample during thermalization.

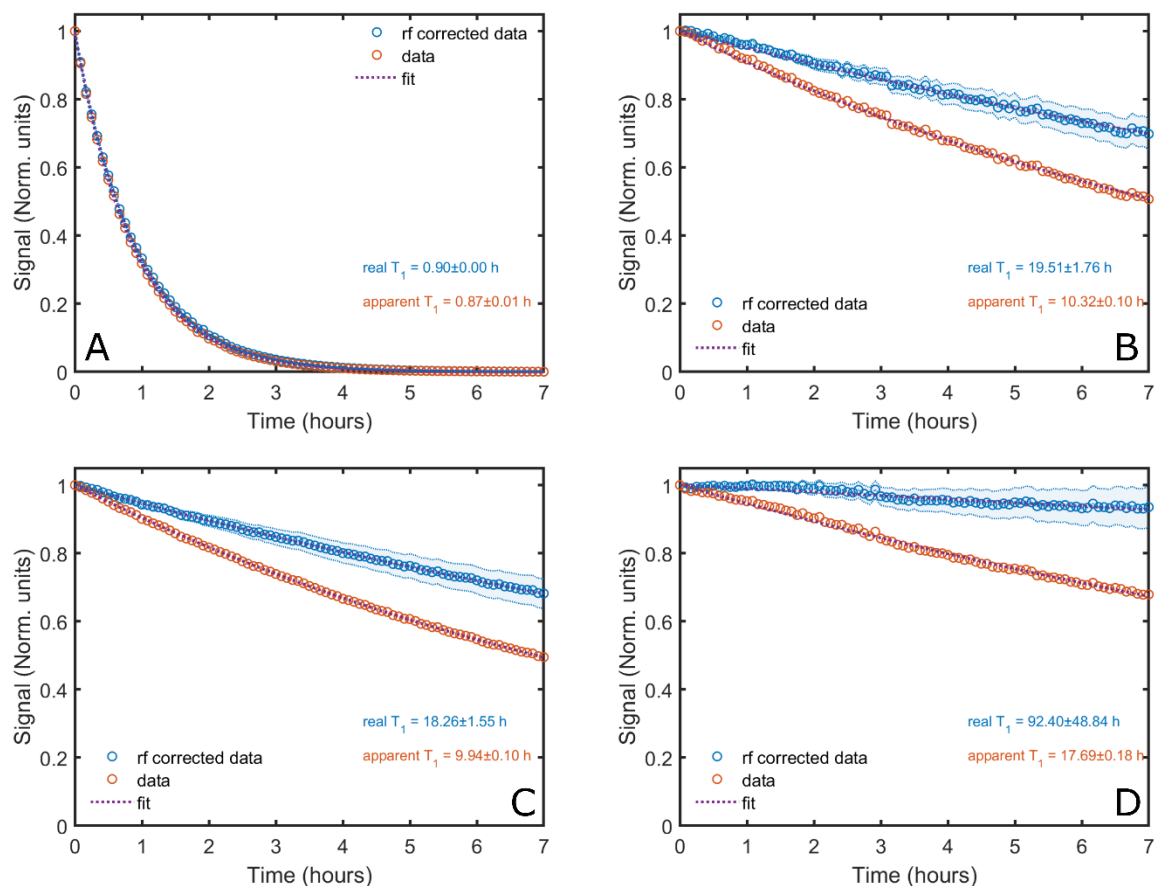

**Figure S5. Relaxation at transport conditions:**  $T_1$  measurements at 4 K and 1 T by means of  $5^\circ$  excitation pulses every 5 min of hyperpolarized and thermalized glucose samples prepared with TMP as radical precursor and a protonated solvent (A); dTMP as radical precursor and a protonated solvent (B); AKG as radical precursor and a protonated solvent (C); AKG as radical precursor and a deuterated solvent (D). In all panels, the red circles represent the integral of the spectrum measured from the spectrometer; the blue circles were corrected for the rf pulse. The blue shaded areas represent the error on the  $T_1$  values coming from the error on the estimation of the flip angle.

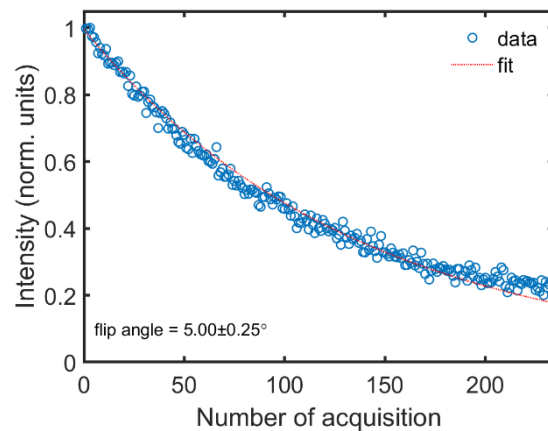

45

46 **Figure S6. Portable cryostat  $B_1$  calibration on  $^{13}\text{C}$ :** one hyperpolarized and thermalized glucose sample was used to  
 47 calibrate the pulse angle of the NMR probe of the transportable cryostat. A train of 250 pulses spaced by 10 ms and  
 48 with a length of 10  $\mu\text{s}$  and a power of 5 W made the signal to decay. The decay was fit with the equation  $S(n) =$   
 49  $S(0)\cos(\theta)^{n-1}$ , where  $\theta$  is the flip angle and  $n$  the number of acquisitions. Knowing that  $\theta = \gamma_{13\text{C}}B_1\tau$ , where  $\gamma_{13\text{C}}$ ,  
 50  $B_1$ , and  $\tau$  are the carbon gyromagnetic ration, the magnetic field intensity generated by the NMR coil and the length  
 51 of the pulse, respectively,  $B_1 = 1.30 \pm 0.06 \text{ G}$ .

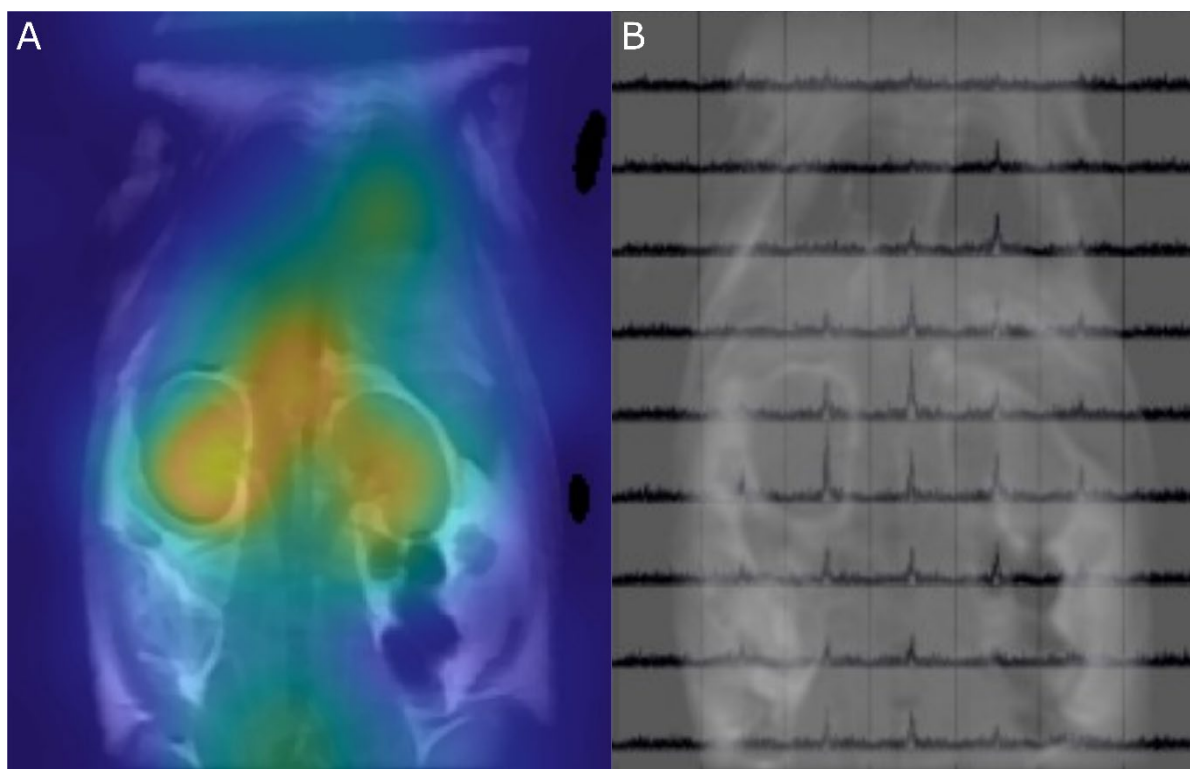

**Figure S7. Chemical Shift Imaging (CSI) of glucose in a healthy rat model:** MRI was performed on a 3T scanner (MR750, GE Healthcare, USA) with a  $^{13}\text{C}/^1\text{H}$  rat volume coil (RAPID Biomedical, Germany). A volume of 1 ml was injected through a tail vein catheter. Anatomical images were acquired for reference. A fast spin echo sequence was used for the body (1500 ms repetition time, 11 ms echo time, 24 echo train length, 4 mm slice thickness,  $160 \times 160$  matrix for an 160 x 160 mm field-of-view, flip angle =  $16^\circ$ ). Hereafter,  $^{13}\text{C}$  CSI was performed and images were acquired (65 ms repetition time, 10 x 10 matrix for a 120 x 120 mm field-of-view, spectral resolution = 1024 Hz, bandwidth = 20.000 Hz, flip angle =  $10^\circ$ ). The transmit gain was calibrated using a phantom with appropriate load and kept constant throughout the experiment. The carbon center frequency was extrapolated from the proton frequency and kept constant within the same animal.

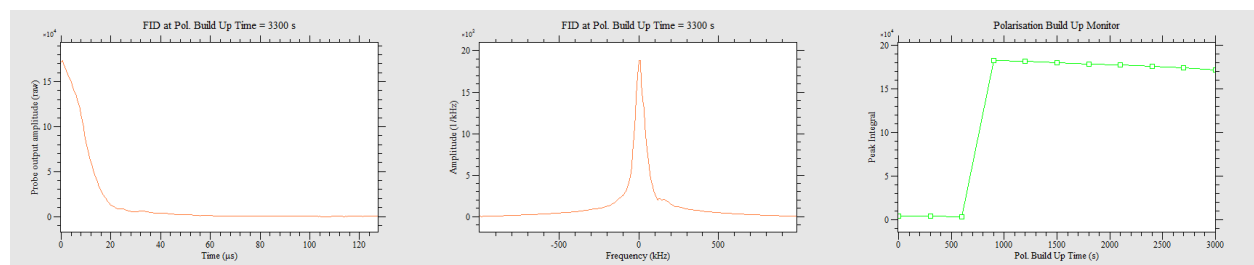

**Figure S8. Signal check after extraction of the HP001 sample (spectrometer print screen):** before attempting transport to Aarhus University Hospital, the signal of the extracted sample was first checked and compared to previous

experiments. We report here a print screen of the spectrometer before disconnecting the electronics of the transportable cryostat. The three panel, from left to right, represent the signal FID, its Fourier Transform (NMR spectrum), and the integral of the spectrum as a function of time. Points were acquired every 5 min. The acquisition was started before insertion of the sample into the cryostat to get a base line reference and evaluate the decay. Before departure, the signal was observed for 45 min and negligible signal loss detected. During transport, no NMR pulsing was applied to conserve as much signal as possible.

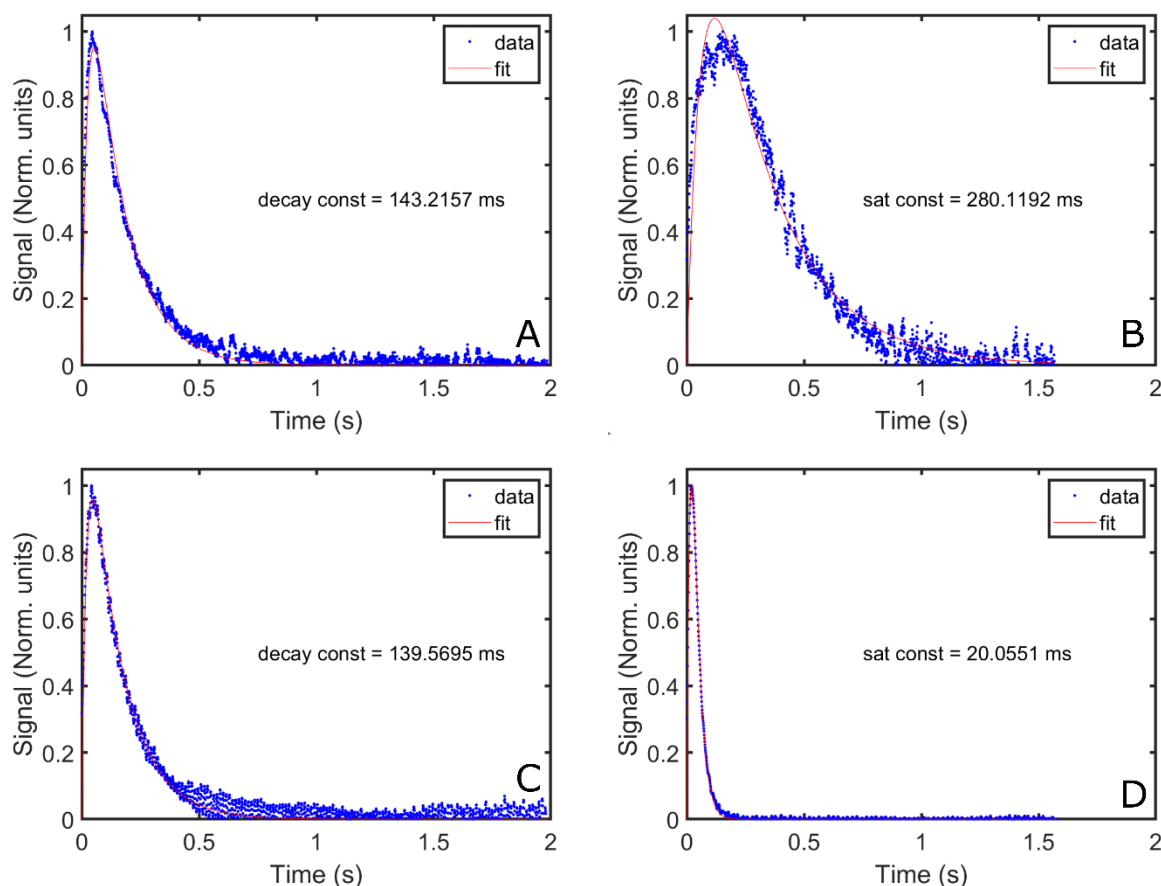

**Figure S9. Effect of FM on electron excitation and relaxation:** electron spins dynamic, measured by means of LOD-ESR <sup>1</sup>, of the radicals induced on a sample containing 2 M glucose and 0.7 M AKG in a deuterated solvent upon switching OFF the microwaves after excitation with no FM (A); switching ON the microwaves after relaxation with no FM (B); switching OFF of the microwaves after excitation with 50 MHz FM (A); switching ON of the microwaves after relaxation with 50 MHz FM (D). While relaxation was FM insensitive, excitation became much faster when FM was applied.



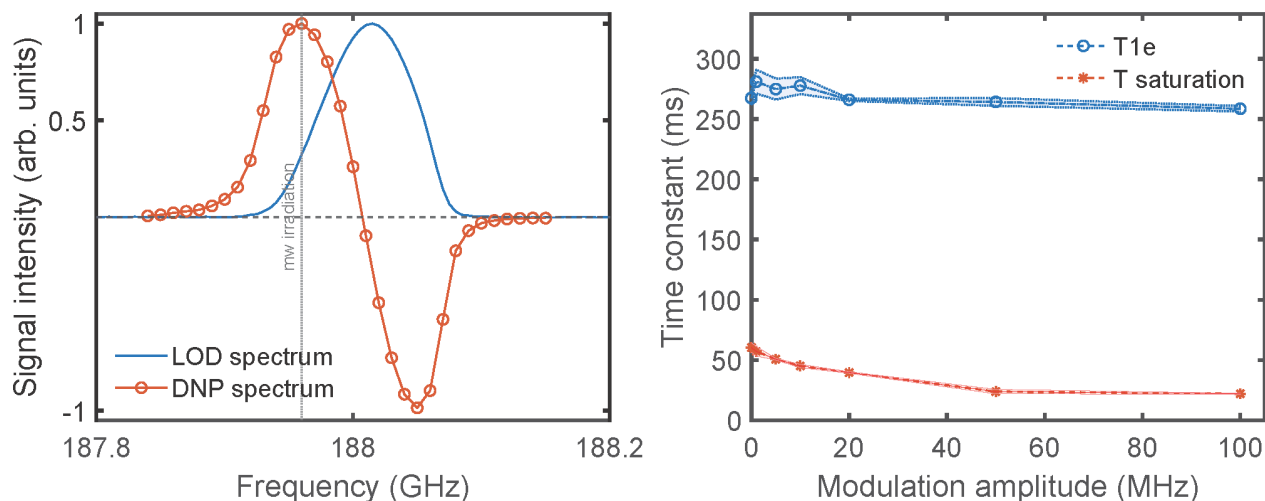

**Figure S10. LOD-ESR and DNP characterization of a 2M glucose sample doped with 20 mM of trityl radical:** as a comparison we report the LOD-ESR and DNP investigation of a sample that did not benefit from FM (i.e. no increase in DNP enhancement). The ESR spectrum and DNP spectrum are overlapped in panel **A**. The relaxation and excitation dynamics of the radical spins as a function of FM is reported in panel **B**. It is important noticing that, differently from the AKG sample, excitation was much faster than relaxation already for monochromatic microwave irradiation.

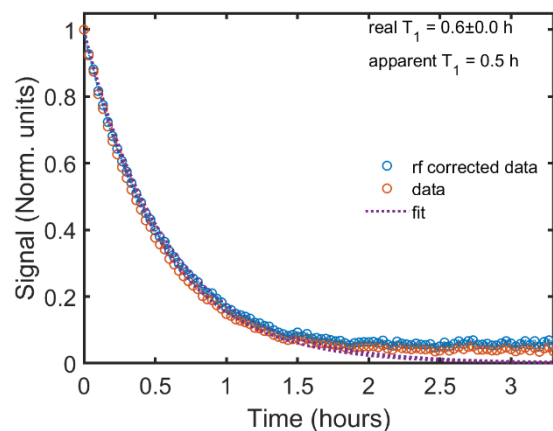

**Figure S11. Relaxation 1 T and 77 K:** The relaxation of the sample prepared with 2M glucose and 0.7 AKG dissolved in a deuterated solvent is reported after thermalization from the transportable cryostat filled with liquid nitrogen.

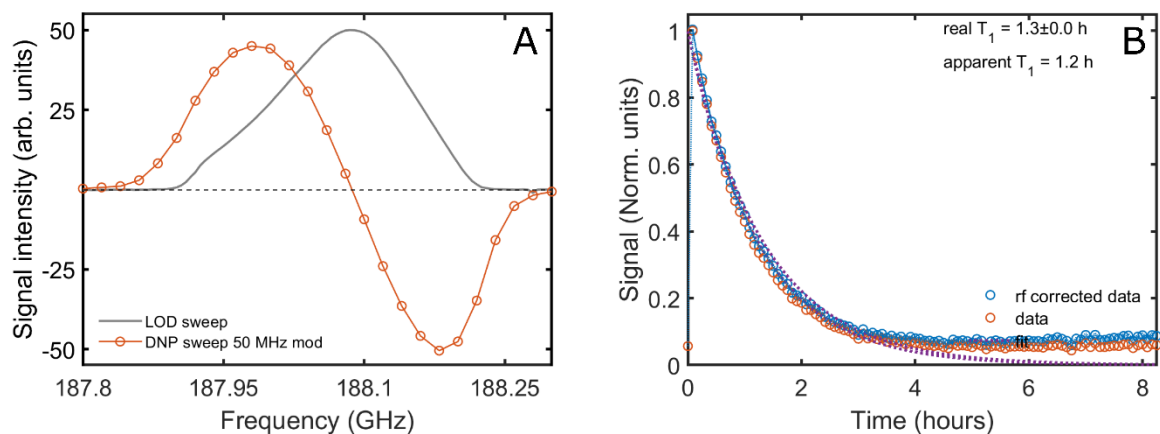

**Figure S12. Note on pyruvic acid:** the DNP performance from the polarizer (A) and relaxation from the transportable cryostat, 1 T/4.2 K, after thermalization (B) are reported for a UV-irradiated sample prepared with 7 M [d<sub>4</sub>, 1-<sup>13</sup>C]pyruvic acid dissolved in d<sub>8</sub>-glycerol:D<sub>2</sub>O.

## References

1. Capozzi, A., Karlsson, M., Petersen, J. R., Lerche, M. H. & Ardenkjaer-Larsen, J. H. Liquid-State <sup>13</sup>C Polarization of 30% through Photoinduced Nonpersistent Radicals. *J. Phys. Chem. C* **122**, 7432–7443 (2018).
